# Supplementary material for: A Bioactive Degradable Composite Bone Cement Based on Calcium Sulfate and Magnesium Polyphosphate
Source: MDPI journal article supplement (doi:10.3390/ma17081861), 2024-04-18
Supplement: s1 [file s1]

## Supporting Information

### A bioactive degradable composite bone cement based on calcium sulfate and magnesium polyphosphate

Suping Peng<sup>1</sup>, Xinyue Yang<sup>1</sup>, Wangcai Zou<sup>1</sup>, Xiaolu Chen<sup>2</sup>, Hao Deng<sup>2</sup>, Yonggang Yan<sup>2</sup> \* Qiyi Zhang<sup>1</sup> \*,

<sup>1</sup>School of Chemical Engineering, Sichuan University, Chengdu, Sichuan, 610065, P. R. China; 2021223075215@stu.scu.edu.cn (Suping Peng)

<sup>2</sup>College of Physics, Sichuan University, Chengdu, Sichuan, 610065, P. R. China

\*Correspondence: qyzhang-scu@163.com (Qiyi Zhang); yan\_yonggang@vip.163.com (Yonggang Yan)

Table S1. List of abbreviations

| Full name                                        | Abbreviation     |
|--------------------------------------------------|------------------|
| Calcium sulfate bone cement                      | CSC              |
| Magnesium polyphosphate                          | MPP              |
| Calcium sulfate                                  | CS               |
| Tricalcium silicate                              | C <sub>3</sub> S |
| Hydroxypropyl methylcellulose                    | HPMC             |
| $\alpha$ -calcium sulfate hemihydrate            | $\alpha$ -CSH    |
| Calcium sulfate dihydrate                        | CSD              |
| Alkaline phosphatase activity                    | ALP              |
| Cell Counting Kit-8                              | CCK-8            |
| Polytetrafluoroethylene                          | PTFE             |
| Minimum Essential Medium alpha                   | MEM- $\alpha$    |
| Fetal bovine serum                               | FBS              |
| Mouse embryonic osteoblasts cells                | MC3T3            |
| 4',6-diamidino-2-phenylindole dihydrochloride    | DAPI             |
| Mouse bone marrow-derived mesenchymal stem cells | mBMSCs           |
| Dulbecco's modified Eagle's medium               | DMEM             |
| Carboxymethyl chitosan                           | CMCS             |
| Carboxymethyl cellulose sodium                   | CMC-Na           |

| Full name                         | Abbreviation |
|-----------------------------------|--------------|
| Chitosan quaternary ammonium salt | HACC         |
| Pullulan polysaccharide           | Pul          |
| Hyaluronic acid                   | HA           |
| Hydroxyethyl cellulose            | HEC          |
| Chitosan oligosaccharides         | COS          |

Table S2. The compressive strength of bone cement with different plasticizers

| Plasticizers<br>(1wt %) | CS<br>(g) | MPP<br>(g) | C <sub>3</sub> S<br>(g) | Compressive<br>strength (MPa) |
|-------------------------|-----------|------------|-------------------------|-------------------------------|
| CMCS                    | 4.35      | 0.5        | 0.15                    | 6.3±0.5                       |
| CMC-Na                  | 4.35      | 0.5        | 0.15                    | 7.1±0.8                       |
| HACC                    | 4.35      | 0.5        | 0.15                    | 9.3±0.6                       |
| Pul                     | 4.35      | 0.5        | 0.15                    | 8.3±0.8                       |
| HA                      | 4.35      | 0.5        | 0.15                    | 11.3±0.6                      |
| HPMC                    | 4.35      | 0.5        | 0.15                    | 20.2±2.3                      |
| HEC                     | 4.35      | 0.5        | 0.15                    | 7.4±0                         |
| COS                     | 4.35      | 0.5        | 0.15                    | 5.4±1.4                       |
